# Supplementary material for: Molecular Beacon Assay Development for Severe Acute Respiratory Syndrome Coronavirus 2 Detection
Source: MDPI journal article supplement (doi:10.3390/s21217015), 2021-10-22
Supplement: s1 [file s1]

## Supplementary Material

### Molecular beacon assay development for Severe Acute Respiratory Syndrome Coronavirus 2 detection

Josué Carvalho <sup>1</sup>, Jéssica Lopes-Nunes <sup>1</sup>, Joana Figueiredo <sup>1</sup>, Tiago Santos <sup>1</sup>, André Miranda <sup>1</sup>, Micaela Riscado <sup>1</sup>, Fani Sousa <sup>1,2</sup>, Ana Paula Duarte <sup>1,2</sup>, Sílvia Socorro <sup>1</sup>, Cândida Tomaz <sup>1,2</sup>, Mafalda Felgueiras <sup>3</sup>, Rui Teixeira <sup>3</sup>, Conceição Faria <sup>3</sup>, Carla Cruz <sup>1\*</sup>

<sup>1</sup>CICS-UBI—Centro de Investigação em Ciências da Saúde, Universidade da Beira Interior, Av. Infante D. Henrique, 6200-506 Covilhã, Portugal; josue.carvalho@fcsaude.ubi.pt (J.C.); jessi-ca.nunes@ubi.pt (J.L.-N.); joana.figueiredo@ubi.pt (J.F.); tiago.santos@fcsaude.ubi.pt (T.S.); andre.miranda@ubi.pt (A.M.); micaela.riscado@ubi.pt (M.R.); fani.sousa@fcsaude.ubi.pt (F.S.); apduarte@fcsaude.ubi.pt (A.P.D.); ssocorro@fcsaude.ubi.pt (S.S.); ctomaz@ubi.pt (C.T.T.)

<sup>2</sup>C4—Cloud Computing Competence Centre, UBIMedical, Universidade da Beira Interior, EM506, 6200-284 Covilhã, Portugal

<sup>3</sup>Serviço de Patologia Clínica do Centro Hospitalar Universitário Cova da Beira (CHUCB), 6200-251 Covilhã, Portugal; mafalda.felgueiras@ulsm.min-saude.pt (M.F.); rteixeira@chcbeira.min-saude.pt (R.T.); cfa-ria@chcbeira.min-saude.pt (C.F.)

\*Correspondence: carlacruz@fcsaude.ubi.pt

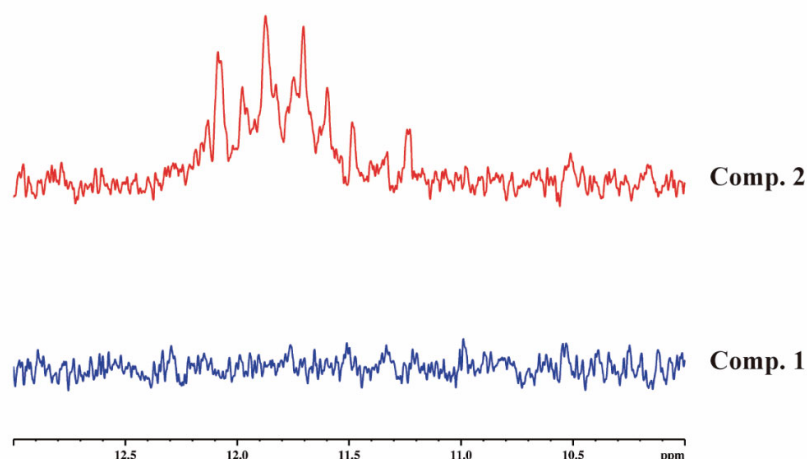

**Figure S1.**  $^1\text{H}$  NMR spectra (imino region) of MB1 and MB2 complementary sequences at 25 °C.

**Table S1.** Analysis of the conservation of PQS in 23 countries and 6 variants of SARS-CoV-2.

| Country     | Variant | Gene                      | QGRS                      | Total of sequences | Number of sequences with PQS | Conservation (%) |
|-------------|---------|---------------------------|---------------------------|--------------------|------------------------------|------------------|
| South Korea | alpha   | ORF1                      | GGTGTGTTGGAGAAGGTTCCGAAGG | 728                | 714                          | 98.08            |
|             |         | S                         | GGCTTATAGGTTTAATGGTATTGG  |                    | 728                          | 100              |
|             | Delta   | ORF1                      | GGTGTGTTGGAGAAGGTTCCGAAGG | 4306               | 4306                         | 100              |
|             |         | S                         | GGCTTATAGGTTTAATGGTATTGG  |                    | 4304                         | 99.95            |
|             | Beta    | ORF1                      | GGTGTGTTGGAGAAGGTTCCGAAGG | 36                 | 35                           | 97.22            |
|             |         | S                         | GGCTTATAGGTTTAATGGTATTGG  |                    | 36                           | 100              |
|             | Gamma   | ORF1                      | GGTGTGTTGGAGAAGGTTCCGAAGG | 14                 | 14                           | 100              |
|             |         | S                         | GGCTTATAGGTTTAATGGTATTGG  |                    | 14                           | 100              |
|             | Lambda  | ORF1                      | GGTGTGTTGGAGAAGGTTCCGAAGG | 0                  | 0                            | 0                |
|             |         | S                         | GGCTTATAGGTTTAATGGTATTGG  |                    | 0                            | 0                |
| Mu          | ORF1    | GGTGTGTTGGAGAAGGTTCCGAAGG | 0                         | 0                  | 0                            |                  |
|             | S       | GGCTTATAGGTTTAATGGTATTGG  |                           | 0                  | 0                            |                  |
| Denmark     | alpha   | ORF1                      | GGTGTGTTGGAGAAGGTTCCGAAGG | 10000              | 9849                         | 98.49            |
|             |         | S                         | GGCTTATAGGTTTAATGGTATTGG  |                    | 9997                         | 99.97            |
|             | Delta   | ORF1                      | GGTGTGTTGGAGAAGGTTCCGAAGG | 10000              | 9952                         | 99.52            |
|             |         | S                         | GGCTTATAGGTTTAATGGTATTGG  |                    | 10000                        | 100              |
|             | Beta    | ORF1                      | GGTGTGTTGGAGAAGGTTCCGAAGG | 106                | 97                           | 91.51            |
|             |         | S                         | GGCTTATAGGTTTAATGGTATTGG  |                    | 106                          | 100              |
|             | Gamma   | ORF1                      | GGTGTGTTGGAGAAGGTTCCGAAGG | 34                 | 34                           | 100              |
|             |         | S                         | GGCTTATAGGTTTAATGGTATTGG  |                    | 34                           | 100              |
|             | Lambda  | ORF1                      | GGTGTGTTGGAGAAGGTTCCGAAGG | 0                  | 0                            | 0                |
|             |         | S                         | GGCTTATAGGTTTAATGGTATTGG  |                    | 0                            | 0                |
| Mu          | ORF1    | GGTGTGTTGGAGAAGGTTCCGAAGG | 4                         | 4                  | 100                          |                  |
|             | S       | GGCTTATAGGTTTAATGGTATTGG  |                           | 4                  | 100                          |                  |
| Japan       | alpha   | ORF1                      | GGTGTGTTGGAGAAGGTTCCGAAGG | 10000              | 9953                         | 99.53            |

|          |        |      |                           |       |       |       |
|----------|--------|------|---------------------------|-------|-------|-------|
|          | Delta  | S    | GGCTTATAGGTTTAATGGTATTGG  | 10000 | 10000 | 100   |
|          |        | ORF1 | GGTGTGTTGGAGAAGGTTCCGAAGG |       | 9989  | 9989  |
|          | Beta   | S    | GGCTTATAGGTTTAATGGTATTGG  | 112   | 10000 | 100   |
|          |        | ORF1 | GGTGTGTTGGAGAAGGTTCCGAAGG |       | 111   | 99.11 |
|          | Gamma  | S    | GGCTTATAGGTTTAATGGTATTGG  | 124   | 112   | 100   |
|          |        | ORF1 | GGTGTGTTGGAGAAGGTTCCGAAGG |       | 124   | 100   |
|          | Lambda | S    | GGCTTATAGGTTTAATGGTATTGG  | 0     | 124   | 100   |
|          |        | ORF1 | GGTGTGTTGGAGAAGGTTCCGAAGG |       | 0     | 0     |
|          | Mu     | S    | GGCTTATAGGTTTAATGGTATTGG  | 5     | 0     | 0     |
|          |        | ORF1 | GGTGTGTTGGAGAAGGTTCCGAAGG |       | 5     | 100   |
|          |        | S    | GGCTTATAGGTTTAATGGTATTGG  |       | 5     | 100   |
|          |        | ORF1 | GGTGTGTTGGAGAAGGTTCCGAAGG |       |       |       |
| Sweden   | alpha  | S    | GGCTTATAGGTTTAATGGTATTGG  | 10000 | 9991  | 99.91 |
|          |        | ORF1 | GGTGTGTTGGAGAAGGTTCCGAAGG |       | 9998  | 99.98 |
|          | Delta  | S    | GGCTTATAGGTTTAATGGTATTGG  | 10000 | 9851  | 98.51 |
|          |        | ORF1 | GGTGTGTTGGAGAAGGTTCCGAAGG |       | 9993  | 99.93 |
|          | Beta   | S    | GGCTTATAGGTTTAATGGTATTGG  | 2173  | 2141  | 98.53 |
|          |        | ORF1 | GGTGTGTTGGAGAAGGTTCCGAAGG |       | 2173  | 100   |
|          | Gamma  | S    | GGCTTATAGGTTTAATGGTATTGG  | 132   | 132   | 100   |
|          |        | ORF1 | GGTGTGTTGGAGAAGGTTCCGAAGG |       | 132   | 100   |
|          | Lambda | S    | GGCTTATAGGTTTAATGGTATTGG  | 0     | 0     | 0     |
|          |        | ORF1 | GGTGTGTTGGAGAAGGTTCCGAAGG |       | 0     | 0     |
|          | Mu     | S    | GGCTTATAGGTTTAATGGTATTGG  | 0     | 0     | 0     |
|          |        | ORF1 | GGTGTGTTGGAGAAGGTTCCGAAGG |       | 0     | 0     |
| Italy    | alpha  | S    | GGCTTATAGGTTTAATGGTATTGG  | 10000 | 9980  | 99.80 |
|          |        | ORF1 | GGTGTGTTGGAGAAGGTTCCGAAGG |       | 9997  | 99.97 |
|          | Delta  | S    | GGCTTATAGGTTTAATGGTATTGG  | 10000 | 9873  | 98.73 |
|          |        | ORF1 | GGTGTGTTGGAGAAGGTTCCGAAGG |       | 10000 | 100   |
|          | Beta   | S    | GGCTTATAGGTTTAATGGTATTGG  | 99    | 88    | 88.89 |
|          |        | ORF1 | GGTGTGTTGGAGAAGGTTCCGAAGG |       | 99    | 100   |
|          | Gamma  | S    | GGCTTATAGGTTTAATGGTATTGG  | 2080  | 2076  | 99.81 |
|          |        | ORF1 | GGTGTGTTGGAGAAGGTTCCGAAGG |       | 2080  | 100   |
|          | Lambda | S    | GGCTTATAGGTTTAATGGTATTGG  | 3     | 3     | 100   |
|          |        | ORF1 | GGTGTGTTGGAGAAGGTTCCGAAGG |       | 3     | 100   |
|          | Mu     | S    | GGCTTATAGGTTTAATGGTATTGG  | 61    | 59    | 96.72 |
|          |        | ORF1 | GGTGTGTTGGAGAAGGTTCCGAAGG |       | 61    | 100   |
| Portugal | alpha  | S    | GGCTTATAGGTTTAATGGTATTGG  | 3885  | 3836  | 98.74 |
|          |        | ORF1 | GGTGTGTTGGAGAAGGTTCCGAAGG |       | 3884  | 99.97 |
|          | Delta  | S    | GGCTTATAGGTTTAATGGTATTGG  | 7014  | 5305  | 75.63 |
|          |        | ORF1 | GGTGTGTTGGAGAAGGTTCCGAAGG |       | 7007  | 99.90 |
|          | Beta   | S    | GGCTTATAGGTTTAATGGTATTGG  | 80    | 80    | 100   |
|          |        | ORF1 | GGTGTGTTGGAGAAGGTTCCGAAGG |       | 80    | 100   |
|          | Gamma  | S    | GGCTTATAGGTTTAATGGTATTGG  | 137   | 137   | 100   |
|          |        | ORF1 | GGTGTGTTGGAGAAGGTTCCGAAGG |       | 137   | 100   |
|          | Lambda | S    | GGCTTATAGGTTTAATGGTATTGG  | 1     | 1     | 100   |
|          |        | ORF1 | GGTGTGTTGGAGAAGGTTCCGAAGG |       | 1     | 100   |
|          | Mu     | S    | GGCTTATAGGTTTAATGGTATTGG  | 21    | 20    | 95.24 |
|          |        | ORF1 | GGTGTGTTGGAGAAGGTTCCGAAGG |       | 20    | 95.24 |

|                |        |      |                           |       |      |       |
|----------------|--------|------|---------------------------|-------|------|-------|
|                |        | S    | GGCTTATAGGTTTAATGGTATTGG  |       | 21   | 100   |
| United Kingdom | alpha  | ORF1 | GGTGTGTTGGAGAAGGTTCCGAAGG | 10000 | 9964 | 99.64 |
|                |        | S    | GGCTTATAGGTTTAATGGTATTGG  |       | 9993 | 99.93 |
|                | Delta  | ORF1 | GGTGTGTTGGAGAAGGTTCCGAAGG | 10000 | 9955 | 99.55 |
|                |        | S    | GGCTTATAGGTTTAATGGTATTGG  |       | 9996 | 99.96 |
|                | Beta   | ORF1 | GGTGTGTTGGAGAAGGTTCCGAAGG | 792   | 788  | 99.49 |
|                |        | S    | GGCTTATAGGTTTAATGGTATTGG  |       | 787  | 99.37 |
|                | Gamma  | ORF1 | GGTGTGTTGGAGAAGGTTCCGAAGG | 168   | 167  | 99.40 |
|                |        | S    | GGCTTATAGGTTTAATGGTATTGG  |       | 168  | 100   |
|                | Lambda | ORF1 | GGTGTGTTGGAGAAGGTTCCGAAGG | 1     | 1    | 100   |
|                |        | S    | GGCTTATAGGTTTAATGGTATTGG  |       | 1    | 100   |
|                | Mu     | ORF1 | GGTGTGTTGGAGAAGGTTCCGAAGG | 45    | 42   | 93.33 |
|                |        | S    | GGCTTATAGGTTTAATGGTATTGG  |       | 45   | 100   |
| USA            | alpha  | ORF1 | GGTGTGTTGGAGAAGGTTCCGAAGG | 10000 | 9927 | 99.27 |
|                |        | S    | GGCTTATAGGTTTAATGGTATTGG  |       | 9993 | 99.93 |
|                | Delta  | ORF1 | GGTGTGTTGGAGAAGGTTCCGAAGG | 10000 | 9972 | 99.72 |
|                |        | S    | GGCTTATAGGTTTAATGGTATTGG  |       | 9993 | 99.93 |
|                | Beta   | ORF1 | GGTGTGTTGGAGAAGGTTCCGAAGG | 1908  | 1846 | 96.75 |
|                |        | S    | GGCTTATAGGTTTAATGGTATTGG  |       | 1907 | 99.95 |
|                | Gamma  | ORF1 | GGTGTGTTGGAGAAGGTTCCGAAGG | 10000 | 9977 | 99.77 |
|                |        | S    | GGCTTATAGGTTTAATGGTATTGG  |       | 9997 | 99.97 |
|                | Lambda | ORF1 | GGTGTGTTGGAGAAGGTTCCGAAGG | 83    | 83   | 100   |
|                |        | S    | GGCTTATAGGTTTAATGGTATTGG  |       | 83   | 100   |
|                | Mu     | ORF1 | GGTGTGTTGGAGAAGGTTCCGAAGG | 2469  | 2456 | 99.47 |
|                |        | S    | GGCTTATAGGTTTAATGGTATTGG  |       | 2467 | 99.92 |
| Australia      | alpha  | ORF1 | GGTGTGTTGGAGAAGGTTCCGAAGG | 401   | 395  | 98.50 |
|                |        | S    | GGCTTATAGGTTTAATGGTATTGG  |       | 401  | 100   |
|                | Delta  | ORF1 | GGTGTGTTGGAGAAGGTTCCGAAGG | 7966  | 6984 | 87.67 |
|                |        | S    | GGCTTATAGGTTTAATGGTATTGG  |       | 7966 | 100   |
|                | Beta   | ORF1 | GGTGTGTTGGAGAAGGTTCCGAAGG | 50    | 50   | 100   |
|                |        | S    | GGCTTATAGGTTTAATGGTATTGG  |       | 50   | 100   |
|                | Gamma  | ORF1 | GGTGTGTTGGAGAAGGTTCCGAAGG | 3     | 3    | 100   |
|                |        | S    | GGCTTATAGGTTTAATGGTATTGG  |       | 3    | 100   |
|                | Lambda | ORF1 | GGTGTGTTGGAGAAGGTTCCGAAGG | 1     | 1    | 100   |
|                |        | S    | GGCTTATAGGTTTAATGGTATTGG  |       | 1    | 100   |
|                | Mu     | ORF1 | GGTGTGTTGGAGAAGGTTCCGAAGG | 0     | 0    | 0     |
|                |        | S    | GGCTTATAGGTTTAATGGTATTGG  |       | 0    | 0     |
| Spain          | alpha  | ORF1 | GGTGTGTTGGAGAAGGTTCCGAAGG | 10000 | 9861 | 98.61 |
|                |        | S    | GGCTTATAGGTTTAATGGTATTGG  |       | 9995 | 99.95 |
|                | Delta  | ORF1 | GGTGTGTTGGAGAAGGTTCCGAAGG | 10000 | 9777 | 97.77 |
|                |        | S    | GGCTTATAGGTTTAATGGTATTGG  |       | 9998 | 99.98 |
|                | Beta   | ORF1 | GGTGTGTTGGAGAAGGTTCCGAAGG | 255   | 255  | 100   |
|                |        | S    | GGCTTATAGGTTTAATGGTATTGG  |       | 255  | 100   |
|                | Gamma  | ORF1 | GGTGTGTTGGAGAAGGTTCCGAAGG | 901   | 901  | 100   |
|                |        | S    | GGCTTATAGGTTTAATGGTATTGG  |       | 901  | 100   |
|                | Lambda | ORF1 | GGTGTGTTGGAGAAGGTTCCGAAGG | 90    | 90   | 100   |

|             |        |      |                           |       |       |       |
|-------------|--------|------|---------------------------|-------|-------|-------|
|             |        | S    | GGCTTATAGGTTTAATGGTATTGG  |       | 90    | 100   |
|             | Mu     | ORF1 | GGTGTGTTGGAGAAGGTTCCGAAGG | 483   | 483   | 100   |
|             |        | S    | GGCTTATAGGTTTAATGGTATTGG  |       | 482   | 99.79 |
| India       | alpha  | ORF1 | GGTGTGTTGGAGAAGGTTCCGAAGG | 4939  | 4888  | 98.97 |
|             |        | S    | GGCTTATAGGTTTAATGGTATTGG  |       | 4934  | 99.90 |
|             | Delta  | ORF1 | GGTGTGTTGGAGAAGGTTCCGAAGG | 10000 | 9922  | 99.22 |
|             |        | S    | GGCTTATAGGTTTAATGGTATTGG  |       | 9988  | 99.88 |
|             | Beta   | ORF1 | GGTGTGTTGGAGAAGGTTCCGAAGG | 115   | 114   | 99.13 |
|             |        | S    | GGCTTATAGGTTTAATGGTATTGG  |       | 115   | 100   |
|             | Gamma  | ORF1 | GGTGTGTTGGAGAAGGTTCCGAAGG | 1     | 1     | 100   |
|             |        | S    | GGCTTATAGGTTTAATGGTATTGG  |       | 1     | 100   |
|             | Lambda | ORF1 | GGTGTGTTGGAGAAGGTTCCGAAGG | 0     | 0     | 0     |
|             |        | S    | GGCTTATAGGTTTAATGGTATTGG  |       | 0     | 0     |
|             | Mu     | ORF1 | GGTGTGTTGGAGAAGGTTCCGAAGG | 0     | 0     | 0     |
|             |        | S    | GGCTTATAGGTTTAATGGTATTGG  |       | 0     | 0     |
| Netherlands | alpha  | ORF1 | GGTGTGTTGGAGAAGGTTCCGAAGG | 10000 | 9849  | 98.49 |
|             |        | S    | GGCTTATAGGTTTAATGGTATTGG  |       | 9998  | 99.98 |
|             | Delta  | ORF1 | GGTGTGTTGGAGAAGGTTCCGAAGG | 10000 | 9931  | 99.31 |
|             |        | S    | GGCTTATAGGTTTAATGGTATTGG  |       | 10000 | 100   |
|             | Beta   | ORF1 | GGTGTGTTGGAGAAGGTTCCGAAGG | 631   | 602   | 95.40 |
|             |        | S    | GGCTTATAGGTTTAATGGTATTGG  |       | 631   | 100   |
|             | Gamma  | ORF1 | GGTGTGTTGGAGAAGGTTCCGAAGG | 523   | 517   | 98.85 |
|             |        | S    | GGCTTATAGGTTTAATGGTATTGG  |       | 523   | 100   |
|             | Lambda | ORF1 | GGTGTGTTGGAGAAGGTTCCGAAGG | 2     | 2     | 100   |
|             |        | S    | GGCTTATAGGTTTAATGGTATTGG  |       | 2     | 100   |
|             | Mu     | ORF1 | GGTGTGTTGGAGAAGGTTCCGAAGG | 63    | 63    | 100   |
|             |        | S    | GGCTTATAGGTTTAATGGTATTGG  |       | 63    | 100   |
| Canada      | alpha  | ORF1 | GGTGTGTTGGAGAAGGTTCCGAAGG | 10000 | 9948  | 99.48 |
|             |        | S    | GGCTTATAGGTTTAATGGTATTGG  |       | 9994  | 99.94 |
|             | Delta  | ORF1 | GGTGTGTTGGAGAAGGTTCCGAAGG | 10000 | 9773  | 97.73 |
|             |        | S    | GGCTTATAGGTTTAATGGTATTGG  |       | 10000 | 100   |
|             | Beta   | ORF1 | GGTGTGTTGGAGAAGGTTCCGAAGG | 776   | 770   | 99.23 |
|             |        | S    | GGCTTATAGGTTTAATGGTATTGG  |       | 776   | 100   |
|             | Gamma  | ORF1 | GGTGTGTTGGAGAAGGTTCCGAAGG | 10000 | 9991  | 99.91 |
|             |        | S    | GGCTTATAGGTTTAATGGTATTGG  |       | 9993  | 99.93 |
|             | Lambda | ORF1 | GGTGTGTTGGAGAAGGTTCCGAAGG | 14    | 14    | 100   |
|             |        | S    | GGCTTATAGGTTTAATGGTATTGG  |       | 14    | 100   |
|             | Mu     | ORF1 | GGTGTGTTGGAGAAGGTTCCGAAGG | 20    | 20    | 100   |
|             |        | S    | GGCTTATAGGTTTAATGGTATTGG  |       | 20    | 100   |
| Switzerland | alpha  | ORF1 | GGTGTGTTGGAGAAGGTTCCGAAGG | 10000 | 9753  | 97.53 |
|             |        | S    | GGCTTATAGGTTTAATGGTATTGG  |       | 9998  | 99.98 |
|             | Delta  | ORF1 | GGTGTGTTGGAGAAGGTTCCGAAGG | 10000 | 9914  | 99.14 |
|             |        | S    | GGCTTATAGGTTTAATGGTATTGG  |       | 9993  | 99.93 |
|             | Beta   | ORF1 | GGTGTGTTGGAGAAGGTTCCGAAGG | 256   | 256   | 100   |
|             |        | S    | GGCTTATAGGTTTAATGGTATTGG  |       | 256   | 100   |
|             | Gamma  | ORF1 | GGTGTGTTGGAGAAGGTTCCGAAGG | 183   | 183   | 100   |
|             |        |      |                           |       |       |       |

|              |        |      |                           |       |       |       |
|--------------|--------|------|---------------------------|-------|-------|-------|
| South Africa | Lambda | S    | GGCTTATAGGTTTAATGGTATTGG  |       | 183   | 100   |
|              |        | ORF1 | GGTGTGTTGGAGAAGGTTCCGAAGG | 6     | 6     | 100   |
|              |        | S    | GGCTTATAGGTTTAATGGTATTGG  |       | 6     | 100   |
|              | Mu     | ORF1 | GGTGTGTTGGAGAAGGTTCCGAAGG | 36    | 36    | 100   |
|              |        | S    | GGCTTATAGGTTTAATGGTATTGG  |       | 36    | 100   |
|              | alpha  | ORF1 | GGTGTGTTGGAGAAGGTTCCGAAGG | 145   | 145   | 100   |
|              |        | S    | GGCTTATAGGTTTAATGGTATTGG  |       | 145   | 100   |
|              | Delta  | ORF1 | GGTGTGTTGGAGAAGGTTCCGAAGG | 3508  | 3470  | 98.92 |
|              |        | S    | GGCTTATAGGTTTAATGGTATTGG  |       | 3507  | 99.97 |
|              | Beta   | ORF1 | GGTGTGTTGGAGAAGGTTCCGAAGG | 2627  | 2555  | 97.26 |
|              |        | S    | GGCTTATAGGTTTAATGGTATTGG  |       | 2625  | 99.92 |
|              | Gamma  | ORF1 | GGTGTGTTGGAGAAGGTTCCGAAGG | 0     | 0     | 0     |
|              |        | S    | GGCTTATAGGTTTAATGGTATTGG  |       | 0     | 0     |
|              | Lambda | ORF1 | GGTGTGTTGGAGAAGGTTCCGAAGG | 0     | 0     | 0     |
|              |        | S    | GGCTTATAGGTTTAATGGTATTGG  |       | 0     | 0     |
|              | Mu     | ORF1 | GGTGTGTTGGAGAAGGTTCCGAAGG | 0     | 0     | 0     |
|              |        | S    | GGCTTATAGGTTTAATGGTATTGG  |       | 0     | 0     |
| Belgium      | alpha  | ORF1 | GGTGTGTTGGAGAAGGTTCCGAAGG | 17005 | 16719 | 98.32 |
|              |        | S    | GGCTTATAGGTTTAATGGTATTGG  |       | 16998 | 99.96 |
|              | Delta  | ORF1 | GGTGTGTTGGAGAAGGTTCCGAAGG | 11819 | 11729 | 99.24 |
|              |        | S    | GGCTTATAGGTTTAATGGTATTGG  |       | 11814 | 99.96 |
|              | Beta   | ORF1 | GGTGTGTTGGAGAAGGTTCCGAAGG | 832   | 832   | 100   |
|              |        | S    | GGCTTATAGGTTTAATGGTATTGG  |       | 832   | 100   |
|              | Gamma  | ORF1 | GGTGTGTTGGAGAAGGTTCCGAAGG | 1203  | 1200  | 99.75 |
|              |        | S    | GGCTTATAGGTTTAATGGTATTGG  |       | 1203  | 100   |
|              | Lambda | ORF1 | GGTGTGTTGGAGAAGGTTCCGAAGG | 5     | 5     | 100   |
|              |        | S    | GGCTTATAGGTTTAATGGTATTGG  |       | 5     | 100   |
|              | Mu     | ORF1 | GGTGTGTTGGAGAAGGTTCCGAAGG | 32    | 32    | 100   |
|              |        | S    | GGCTTATAGGTTTAATGGTATTGG  |       | 32    | 100   |
| Ireland      | alpha  | ORF1 | GGTGTGTTGGAGAAGGTTCCGAAGG | 14905 | 14865 | 99.73 |
|              |        | S    | GGCTTATAGGTTTAATGGTATTGG  |       | 14902 | 99.98 |
|              | Delta  | ORF1 | GGTGTGTTGGAGAAGGTTCCGAAGG | 13754 | 13663 | 99.34 |
|              |        | S    | GGCTTATAGGTTTAATGGTATTGG  |       | 13752 | 99.99 |
|              | Beta   | ORF1 | GGTGTGTTGGAGAAGGTTCCGAAGG | 40    | 40    | 100   |
|              |        | S    | GGCTTATAGGTTTAATGGTATTGG  |       | 40    | 100   |
|              | Gamma  | ORF1 | GGTGTGTTGGAGAAGGTTCCGAAGG | 18    | 18    | 100   |
|              |        | S    | GGCTTATAGGTTTAATGGTATTGG  |       | 18    | 100   |
|              | Lambda | ORF1 | GGTGTGTTGGAGAAGGTTCCGAAGG | 0     | 0     | 0     |
|              |        | S    | GGCTTATAGGTTTAATGGTATTGG  |       | 0     | 0     |
|              | Mu     | ORF1 | GGTGTGTTGGAGAAGGTTCCGAAGG | 2     | 2     | 100   |
|              |        | S    | GGCTTATAGGTTTAATGGTATTGG  |       | 2     | 100   |
| Singapore    | alpha  | ORF1 | GGTGTGTTGGAGAAGGTTCCGAAGG | 175   | 173   | 98.86 |
|              |        | S    | GGCTTATAGGTTTAATGGTATTGG  |       | 175   | 100   |
|              | Delta  | ORF1 | GGTGTGTTGGAGAAGGTTCCGAAGG | 5647  | 5628  | 99.66 |
|              |        | S    | GGCTTATAGGTTTAATGGTATTGG  |       | 5640  | 99.88 |
|              | Beta   | ORF1 | GGTGTGTTGGAGAAGGTTCCGAAGG | 195   | 194   | 99.49 |

|              |        |      |                           |       |      |       |
|--------------|--------|------|---------------------------|-------|------|-------|
| China        | Gamma  | S    | GGCTTATAGGTTTAATGGTATTGG  |       | 194  | 99.49 |
|              |        | ORF1 | GGTGTGTTGGAGAAGGTTCCGAAGG | 8     | 8    | 100   |
|              |        | S    | GGCTTATAGGTTTAATGGTATTGG  |       | 8    | 100   |
|              | Lambda | ORF1 | GGTGTGTTGGAGAAGGTTCCGAAGG | 0     | 0    | 0     |
|              |        | S    | GGCTTATAGGTTTAATGGTATTGG  |       | 0    | 0     |
|              | Mu     | ORF1 | GGTGTGTTGGAGAAGGTTCCGAAGG | 0     | 0    | 0     |
|              |        | S    | GGCTTATAGGTTTAATGGTATTGG  |       | 0    | 0     |
|              | alpha  | ORF1 | GGTGTGTTGGAGAAGGTTCCGAAGG | 14    | 14   | 100   |
|              |        | S    | GGCTTATAGGTTTAATGGTATTGG  |       | 14   | 100   |
|              | Delta  | ORF1 | GGTGTGTTGGAGAAGGTTCCGAAGG | 84    | 84   | 100   |
|              |        | S    | GGCTTATAGGTTTAATGGTATTGG  |       | 84   | 100   |
|              | Beta   | ORF1 | GGTGTGTTGGAGAAGGTTCCGAAGG | 2     | 2    | 100   |
|              |        | S    | GGCTTATAGGTTTAATGGTATTGG  |       | 2    | 100   |
|              | Gamma  | ORF1 | GGTGTGTTGGAGAAGGTTCCGAAGG | 0     | 0    | 0     |
|              |        | S    | GGCTTATAGGTTTAATGGTATTGG  |       | 0    | 0     |
|              | Lambda | ORF1 | GGTGTGTTGGAGAAGGTTCCGAAGG | 0     | 0    | 0     |
|              |        | S    | GGCTTATAGGTTTAATGGTATTGG  |       | 0    | 0     |
|              | Mu     | ORF1 | GGTGTGTTGGAGAAGGTTCCGAAGG | 0     | 0    | 0     |
|              |        | S    | GGCTTATAGGTTTAATGGTATTGG  |       | 0    | 0     |
| Saudi Arabia | alpha  | ORF1 | GGTGTGTTGGAGAAGGTTCCGAAGG | 4     | 4    | 100   |
|              |        | S    | GGCTTATAGGTTTAATGGTATTGG  |       | 4    | 100   |
|              | Delta  | ORF1 | GGTGTGTTGGAGAAGGTTCCGAAGG | 0     | 0    | 0     |
|              |        | S    | GGCTTATAGGTTTAATGGTATTGG  |       | 0    | 0     |
|              | Beta   | ORF1 | GGTGTGTTGGAGAAGGTTCCGAAGG | 1     | 1    | 100   |
|              |        | S    | GGCTTATAGGTTTAATGGTATTGG  |       | 1    | 100   |
|              | Gamma  | ORF1 | GGTGTGTTGGAGAAGGTTCCGAAGG | 0     | 0    | 0     |
|              |        | S    | GGCTTATAGGTTTAATGGTATTGG  |       | 0    | 0     |
|              | Lambda | ORF1 | GGTGTGTTGGAGAAGGTTCCGAAGG | 0     | 0    | 0     |
|              |        | S    | GGCTTATAGGTTTAATGGTATTGG  |       | 0    | 0     |
|              | Mu     | ORF1 | GGTGTGTTGGAGAAGGTTCCGAAGG | 0     | 0    | 0     |
|              |        | S    | GGCTTATAGGTTTAATGGTATTGG  |       | 0    | 0     |
| France       | alpha  | ORF1 | GGTGTGTTGGAGAAGGTTCCGAAGG | 10000 | 9896 | 98.96 |
|              |        | S    | GGCTTATAGGTTTAATGGTATTGG  |       | 9993 | 99.93 |
|              | Delta  | ORF1 | GGTGTGTTGGAGAAGGTTCCGAAGG | 10000 | 9944 | 99.44 |
|              |        | S    | GGCTTATAGGTTTAATGGTATTGG  |       | 9998 | 99.98 |
|              | Beta   | ORF1 | GGTGTGTTGGAGAAGGTTCCGAAGG | 2092  | 2078 | 99.33 |
|              |        | S    | GGCTTATAGGTTTAATGGTATTGG  |       | 2091 | 99.95 |
|              | Gamma  | ORF1 | GGTGTGTTGGAGAAGGTTCCGAAGG | 484   | 482  | 99.59 |
|              |        | S    | GGCTTATAGGTTTAATGGTATTGG  |       | 484  | 100   |
|              | Lambda | ORF1 | GGTGTGTTGGAGAAGGTTCCGAAGG | 1     | 1    | 100   |
|              |        | S    | GGCTTATAGGTTTAATGGTATTGG  |       | 1    | 100   |
|              | Mu     | ORF1 | GGTGTGTTGGAGAAGGTTCCGAAGG | 15    | 15   | 100   |
|              |        | S    | GGCTTATAGGTTTAATGGTATTGG  |       | 15   | 100   |
| Iceland      | alpha  | ORF1 | GGTGTGTTGGAGAAGGTTCCGAAGG | 538   | 538  | 100   |
|              |        | S    | GGCTTATAGGTTTAATGGTATTGG  |       | 537  | 99.81 |
|              | Delta  | ORF1 | GGTGTGTTGGAGAAGGTTCCGAAGG | 3383  | 3364 | 99.44 |

|        |        |                          |                          |      |       |       |
|--------|--------|--------------------------|--------------------------|------|-------|-------|
| Brazil | Beta   | S                        | GGCTTATAGGTTTAATGGTATTGG | 1    | 3383  | 100   |
|        |        | ORF1                     | GGTGTGTGGAGAAGGTTCCGAAGG |      | 1     | 100   |
|        | Gamma  | S                        | GGCTTATAGGTTTAATGGTATTGG | 14   | 1     | 100   |
|        |        | ORF1                     | GGTGTGTGGAGAAGGTTCCGAAGG |      | 14    | 100   |
|        | Lambda | S                        | GGCTTATAGGTTTAATGGTATTGG | 0    | 14    | 100   |
|        |        | ORF1                     | GGTGTGTGGAGAAGGTTCCGAAGG |      | 0     | 0     |
|        | Mu     | S                        | GGCTTATAGGTTTAATGGTATTGG | 0    | 0     | 0     |
|        |        | ORF1                     | GGTGTGTGGAGAAGGTTCCGAAGG |      | 0     | 0     |
|        | alpha  | ORF1                     | GGTGTGTGGAGAAGGTTCCGAAGG | 581  | 551   | 94.84 |
|        |        | S                        | GGCTTATAGGTTTAATGGTATTGG |      | 581   | 100   |
|        | Delta  | ORF1                     | GGTGTGTGGAGAAGGTTCCGAAGG | 7276 | 7256  | 99.73 |
|        |        | S                        | GGCTTATAGGTTTAATGGTATTGG |      | 7275  | 99.99 |
| Beta   | ORF1   | GGTGTGTGGAGAAGGTTCCGAAGG | 6                        | 6    | 100   |       |
|        | S      | GGCTTATAGGTTTAATGGTATTGG |                          | 6    | 100   |       |
| Gamma  | ORF1   | GGTGTGTGGAGAAGGTTCCGAAGG | 10000                    | 9951 | 99.51 |       |
|        | S      | GGCTTATAGGTTTAATGGTATTGG |                          | 9995 | 99.95 |       |
| Lambda | ORF1   | GGTGTGTGGAGAAGGTTCCGAAGG | 4                        | 4    | 100   |       |
|        | S      | GGCTTATAGGTTTAATGGTATTGG |                          | 4    | 100   |       |
| Mu     | ORF1   | GGTGTGTGGAGAAGGTTCCGAAGG | 10                       | 10   | 100   |       |
|        | S      | GGCTTATAGGTTTAATGGTATTGG |                          | 10   | 100   |       |

**Table S2. *In silico* analysis for primers and MBs targeting ORF1ab and S regions.**

|                     |                        | <i>In silico</i> analysis for % homology/identity |                |    |                        |                |    |
|---------------------|------------------------|---------------------------------------------------|----------------|----|------------------------|----------------|----|
|                     |                        | ORF 1ab                                           |                |    | S                      |                |    |
| Microorganism       | Genbank Accession Code | Forward Primer                                    | Reverse Primer | MB | Forward Primer         | Reverse Primer | MB |
| Coronavirus 229E    | NC_002645.1            | No alignment was found                            |                |    | No alignment was found |                |    |
| Coronavirus OC43    | NC_006213.1            | No alignment was found                            |                |    | No alignment was found |                |    |
| Coronavirus HKU-1   | NC_006577.2            | No alignment was found                            |                |    | No alignment was found |                |    |
| Coronavirus NL63    | NC_005831.2            | No alignment was found                            |                |    | No alignment was found |                |    |
| SARS-coronavirus    | NC_004718.3            | No alignment was found                            |                |    | No alignment was found |                |    |
| MERS-coronavirus    | NC_019843.3            | No alignment was found                            |                |    | No alignment was found |                |    |
| Human adenovirus 2  | AC_000007.1            | No alignment was found                            |                |    | No alignment was found |                |    |
| Human adenovirus 5  | AC_000008.1            | No alignment was found                            |                |    | No alignment was found |                |    |
| Human adenovirus 54 | NC_012959.1            | No alignment was found                            |                |    | No alignment was found |                |    |
| Human adenovirus A  | NC_001460.1            | No alignment was                                  |                |    | No alignment was       |                |    |



|                             |                  |                        |                        |
|-----------------------------|------------------|------------------------|------------------------|
|                             |                  | found                  | found                  |
| Human adenovirus B1         | NC_011203.1      | No alignment was found | No alignment was found |
| Human adenovirus B2         | NC_011202.1      | No alignment was found | No alignment was found |
| Human adenovirus C          | NC_001405.1      | No alignment was found | No alignment was found |
| Human adenovirus D          | NC_010956.1      | No alignment was found | No alignment was found |
| Human adenovirus E          | NC_003266.2      | No alignment was found | No alignment was found |
| Human adenovirus F          | NC_001454.1      | No alignment was found | No alignment was found |
| Human adenovirus type 1     | AC_000017.1      | No alignment was found | No alignment was found |
| Human adenovirus type 35    | AC_000019.1      | No alignment was found | No alignment was found |
| Human adenovirus type 7     | AC_000018.1      | No alignment was found | No alignment was found |
| Human metapneumovirus       | NC_039199.1      | No alignment was found | No alignment was found |
| Human parainfluenza virus 1 | NC_003461.1      | No alignment was found | No alignment was found |
| Human parainfluenza virus 2 | NC_003443.1      | No alignment was found | No alignment was found |
| Human parainfluenza virus 3 | NC_001796.2      | No alignment was found | No alignment was found |
| Human parainfluenza virus4a | NC_021928.1      | No alignment was found | No alignment was found |
| Influenza A virus H1N1      | GCF_000865725    | No alignment was found | No alignment was found |
| Influenza A virus H3N2      | GCF_000865085    | No alignment was found | No alignment was found |
| Influenza A virus H5N1      | GCF_000864105    | No alignment was found | No alignment was found |
| Influenza A virus H7N9      | GCF_000928555    | No alignment was found | No alignment was found |
| Influenza B virus           | GCF_000820495    | No alignment was found | No alignment was found |
| Influenza C virus           | GCF_000856665.10 | No alignment was found | No alignment was found |
| Enterovirus (e.g. EV68)     | NC_038308.1      | No alignment was found | No alignment was found |
| Human rhinovirus 1          | NC_038311.1      | No alignment was found | No alignment was found |
| Human rhinovirus 3          | NC_038312.1      | No alignment was found | No alignment was found |
| Human rhinovirus 14         | NC_001490.1      | No alignment was found | No alignment was found |

|                                     |                 |                        |      |         |                        |     |         |
|-------------------------------------|-----------------|------------------------|------|---------|------------------------|-----|---------|
| Human rhinovirus 89                 | NC_001617.1     | No alignment was found |      |         | No alignment was found |     |         |
| Human rhinovirus C                  | NC_009996.1     | No alignment was found |      |         | No alignment was found |     |         |
| <i>Chlamydophila pneumoniae</i>     | NC_002180.1     | No alignment was found |      |         | No alignment was found |     |         |
| <i>Haemophilus influenzae</i>       | NZ_LN831035.1   | No alignment was found |      |         | No alignment was found |     |         |
| <i>Legionella pneumophila</i>       | NZ_LR134380.1   | No alignment was found |      |         | No alignment was found |     |         |
| <i>Mycobacterium tuberculosis</i>   | NC_000962.3     | No alignment was found |      |         | No alignment was found |     |         |
| <i>Streptococcus pneumonia</i>      | NZ_LN831051.1   | No alignment was found |      |         | No alignment was found |     |         |
| <i>Streptococcus pyogenes</i>       | NC_002737.2     | No alignment was found |      |         | No alignment was found |     |         |
| <i>Bordetella pertussis</i>         | NC_018518.1     | No alignment was found |      |         | No alignment was found |     |         |
| <i>Mycoplasma pneumoniae</i>        | NZ_CP010546.1   | No alignment was found |      |         | No alignment was found |     |         |
| <i>Pneumocystis jirovecii</i> (PJP) | GCF_001477535.1 | No alignment was found |      |         | No alignment was found |     |         |
| <i>Candida albicans</i>             | GCF_000182965.3 | No alignment was found |      |         | No alignment was found |     |         |
| <i>Pseudomonas aeruginosa</i>       | GCF_000006765.1 | No alignment was found |      |         | No alignment was found |     |         |
| <i>Staphylococcus epidermis</i>     | GCF_000007645.1 | No alignment was found |      |         | No alignment was found |     |         |
| <i>Staphylococcus salivarius</i>    | CP013216.1      | No alignment was found |      |         | No alignment was found |     |         |
| <i>Staphylococcus aureus</i>        | NC_007795.1     | No alignment was found |      |         | No alignment was found |     |         |
| BtRf-AlphaCoV/HuB2013               | KJ473818.1      | No alignment was found |      |         | N/A                    | N/A | 95.83 % |
| BtRf-AlphaCoV/JL2012                | KJ473811.1      | No alignment was found |      |         | N/A                    | N/A | 95.83 % |
| Pangolin coronavirus MP789          | MT084071.1      | No alignment was found |      |         | N/A                    | N/A | 95.83 % |
| Bat coronavirus RacCS203            | MW251308.1      | N/A                    | 100% | N/A     | N/A                    | N/A | 100%    |
| Bat coronavirus RaTG13              | MN996532.2      | N/A                    | N/A  | 96.15 % | N/A                    | N/A | 100%    |
| BetaCoV/Rm/Yunnan/YN02/2019         | MZ081382.1      | N/A                    | N/A  | 92.31 % | N/A                    | N/A | 100%    |
| Bat SARS coronavirus HKU3           | DQ022305.2      | No alignment was found |      |         | 100%                   | N/A | 95.83 % |
| Bat coronavirus isolate B15-21      | KU528591.1      | No alignment was found |      |         | N/A                    | N/A | 95.83 % |
| BtCoV/273/2005                      | DQ648856.1      | No alignment was found |      |         | N/A                    | N/A | 95.83 % |

|                          |            |                        |     |     |         |
|--------------------------|------------|------------------------|-----|-----|---------|
| Bat SARS coronavirus Rf1 | DQ412042.1 | No alignment was found | N/A | N/A | 95.83 % |
|--------------------------|------------|------------------------|-----|-----|---------|

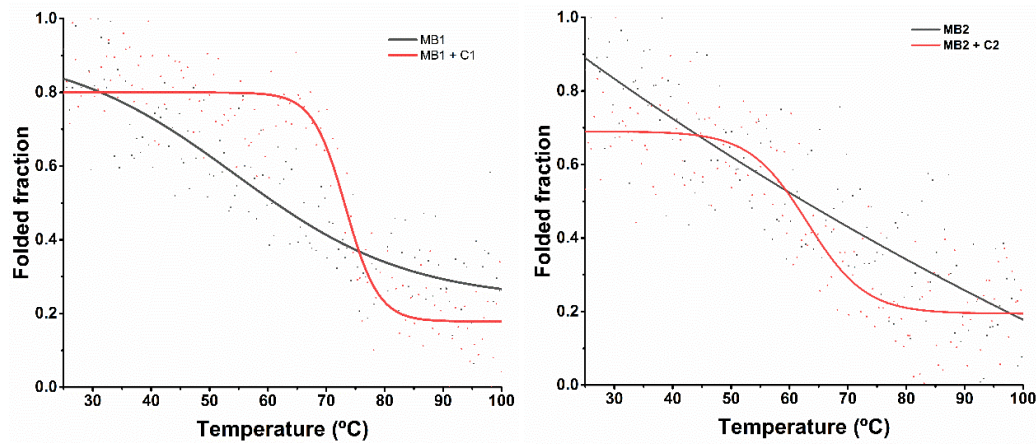

**Figure S2** – Melting Curves Of MB1 and MB2 in presence of complementary sequences C1 and C2, respectively.

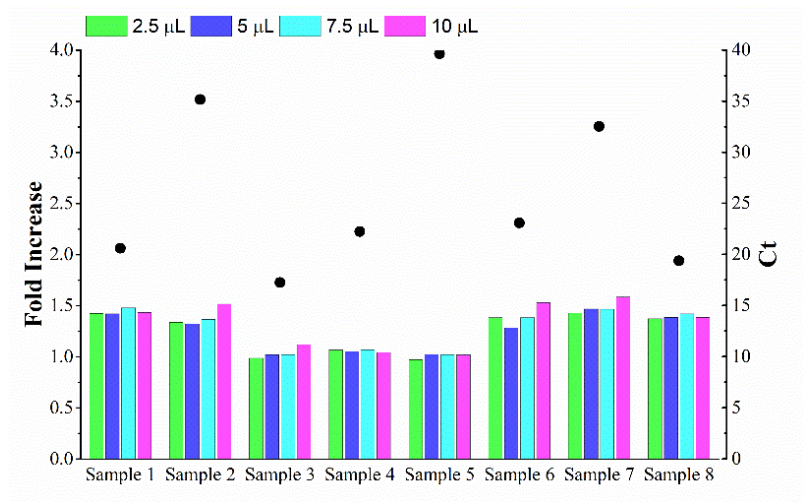

**Figure S3** – Correlation between cycle threshold (Ct) amplification of SARS-CoV-2 in human samples, fluorescence fold-increase relative to the no template control (NTC) and samples with different amount of RNA viral.
